# Supplementary material for: A Novel Vaccine Strategy to Prevent Cytauxzoonosis in Domestic Cats
Source: MDPI journal article supplement (doi:10.3390/vaccines11030573), 2023-03-02
Supplement: s1 [file s1]

## Supplementary Figures

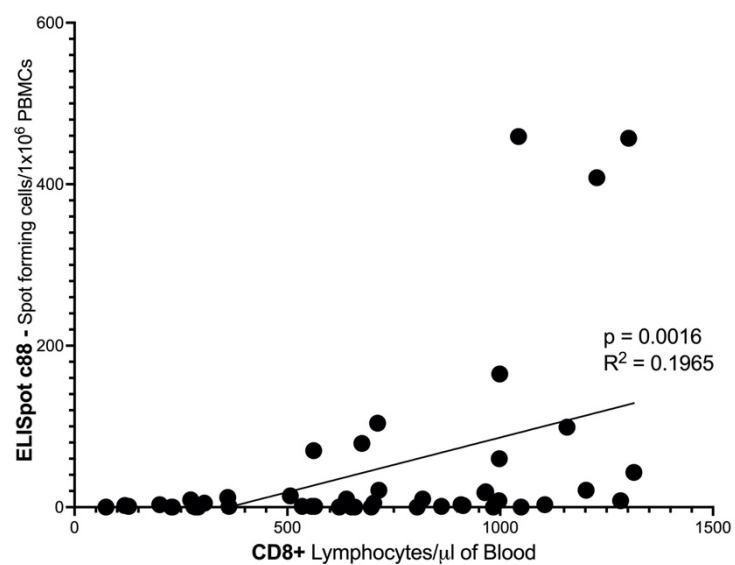

**Figure S1.** A significant correlation was observed between CD8+ cells/μl of blood and the cell-mediated immune response to vaccine epitope c88.

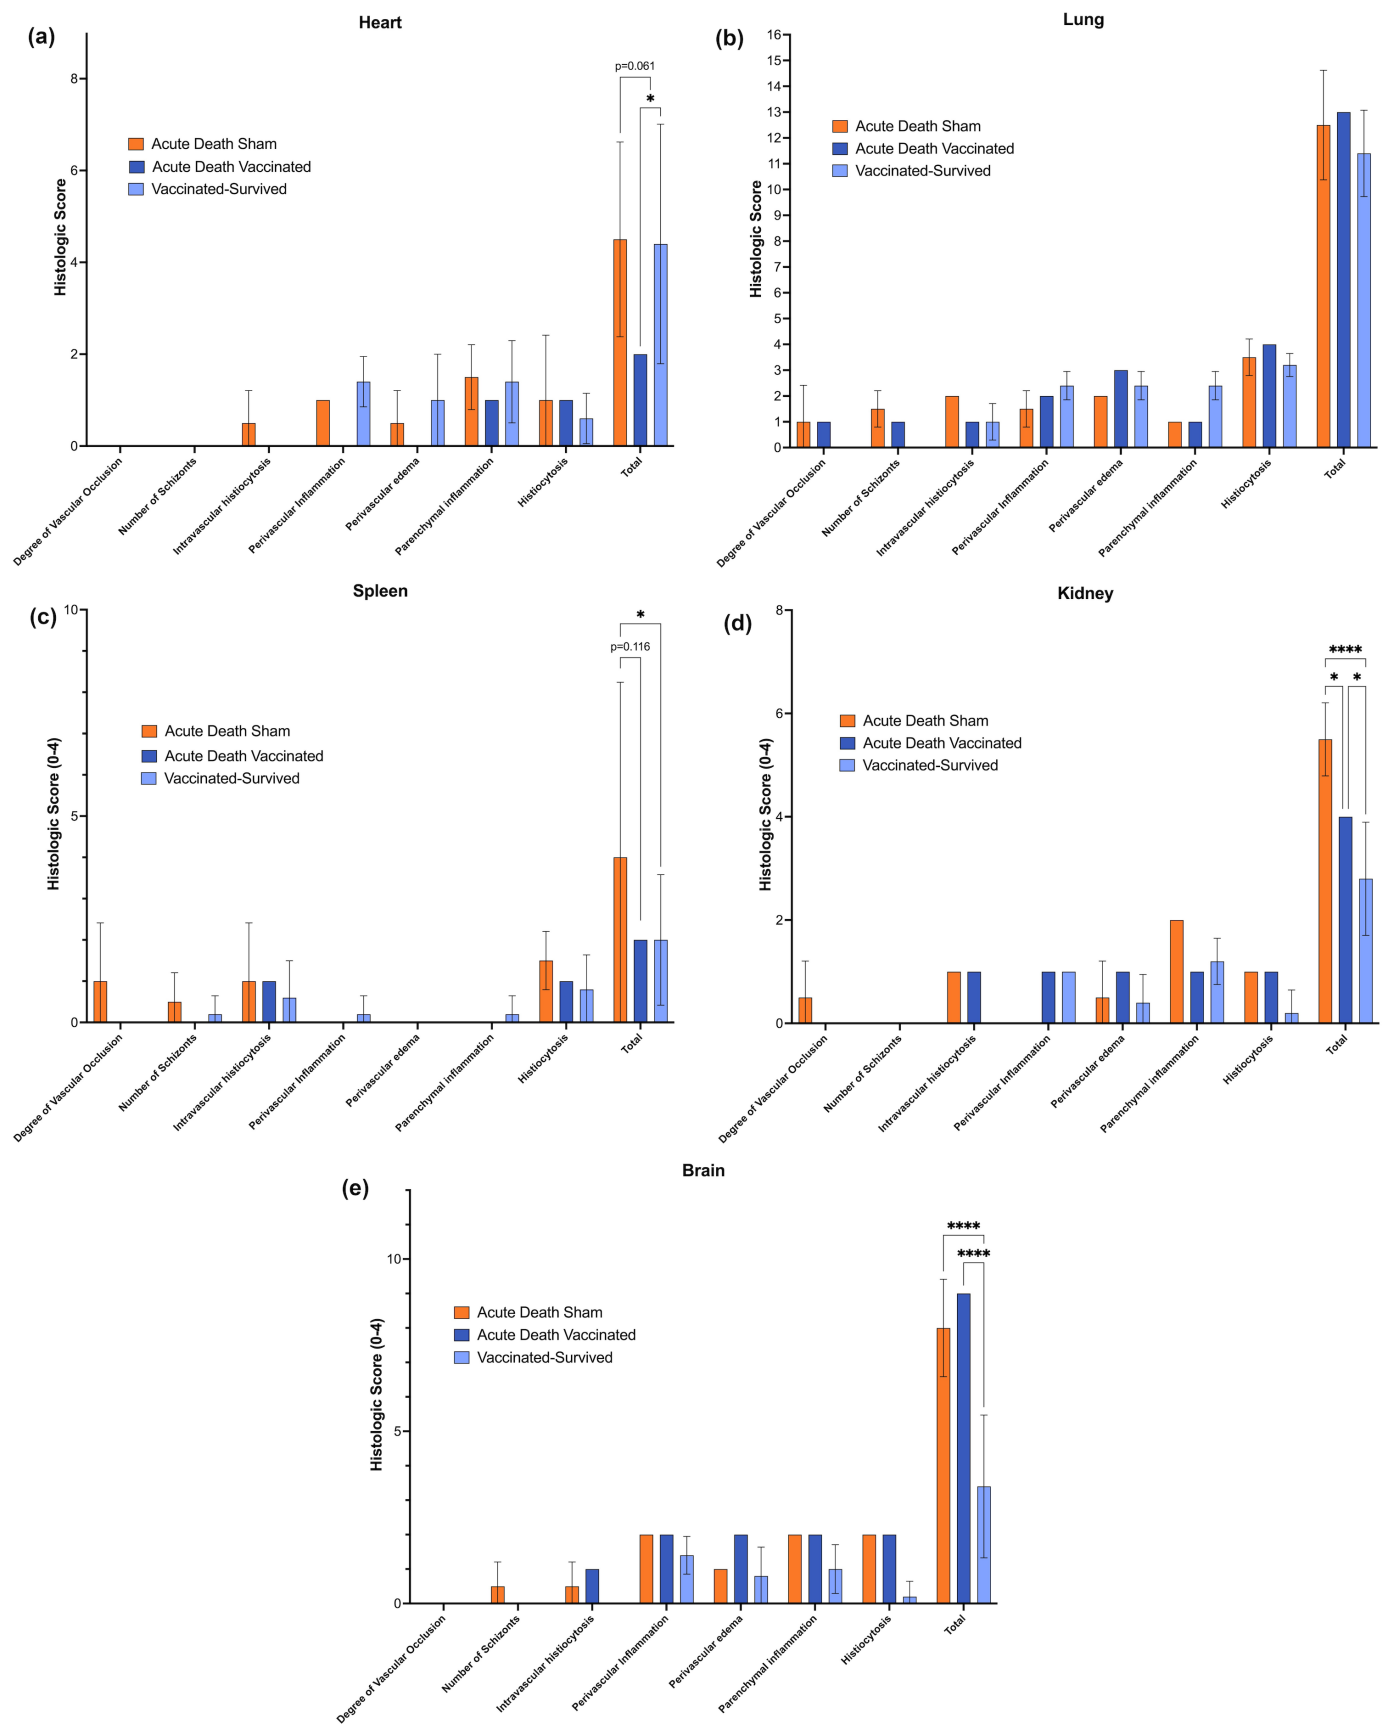

**Figure S2.** Average histological scores of the cats following *C. felis* infection in: (a) heart; (b) lung; (c) spleen; (d) kidney; (e) brain. \*\*\*\*= $p<0.0001$ ; \*= $p<0.05$ .
